# Supplementary material for: Sulfated Polysaccharides as a Fighter with Protein Non-Physiological Aggregation: The Role of Polysaccharide Flexibility and Charge Density
Source: MDPI journal article supplement (doi:10.3390/ijms242216223), 2023-11-12
Supplement: s1 [file s1]

# Supplemental Material

## **Sulfated Polysaccharides as a Fighter with Protein Non-Physiological Aggregation: The Role of Polysaccharide Flexibility and Charge Density**

**Olga N. Makshakova \***, Liliya R. Bogdanova, Dzhigangir A. Faizullin, Elena A. Ermakova and Yuriy F. Zuev

Kazan Institute of Biochemistry and Biophysics, FRC Kazan Scientific Center of RAS, 2/31  
Lobachevsky Str., 420111, Kazan, Russia

\* Correspondence: [olga.makshakova@kibb.knc.ru](mailto:olga.makshakova@kibb.knc.ru)

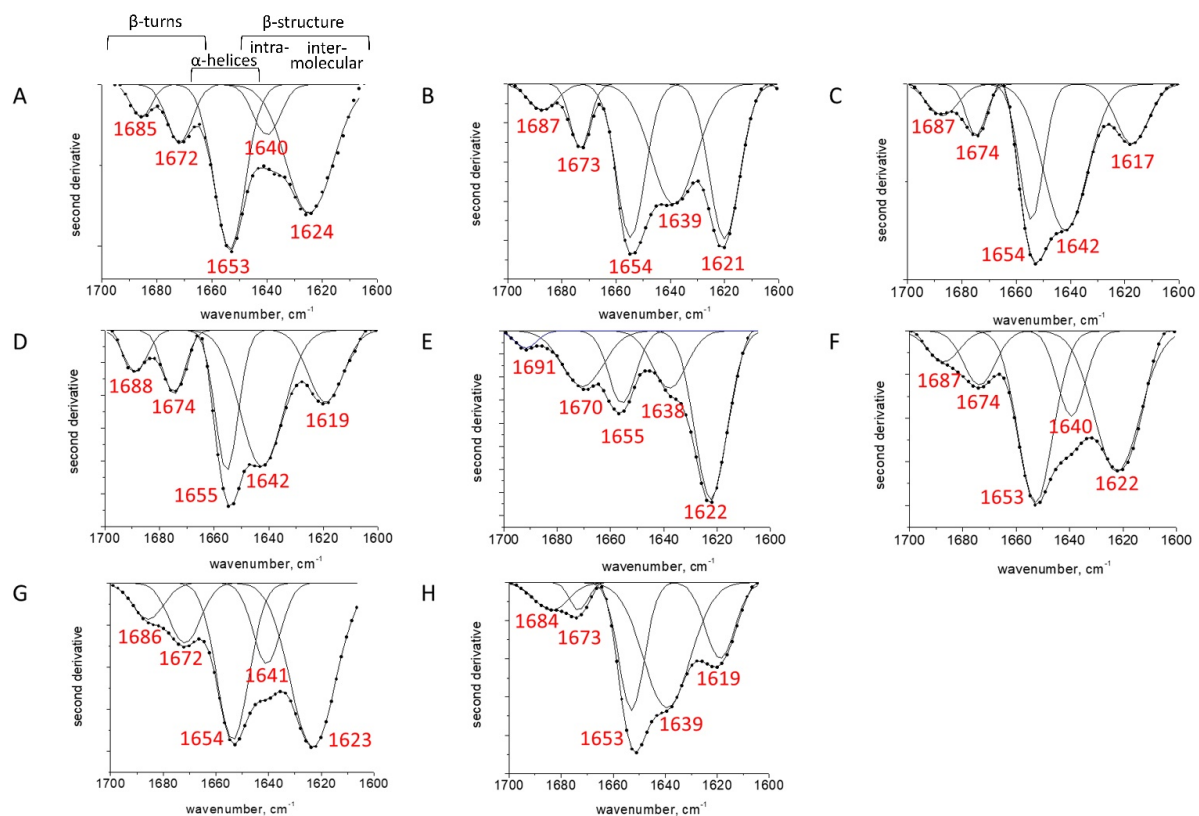

**Figure S1.** Amide I fitting with individual Gaussian components in second-derivative spectra of initial HEWL fibrils solution (A), gel-like complexes of HEWL fibrils and coiled  $\kappa$ -carrageenans with different initial polysaccharide-to-protein ratios: 0.1 (B), 0.3 (C), 0.6 (D), gel-like complexes of HEWL fibrils and  $\iota$ -carrageenan (E),  $\lambda$ -carrageenan (F), helical  $\kappa$ -carrageenan (G), chondroitin-4-sulfate (H). .

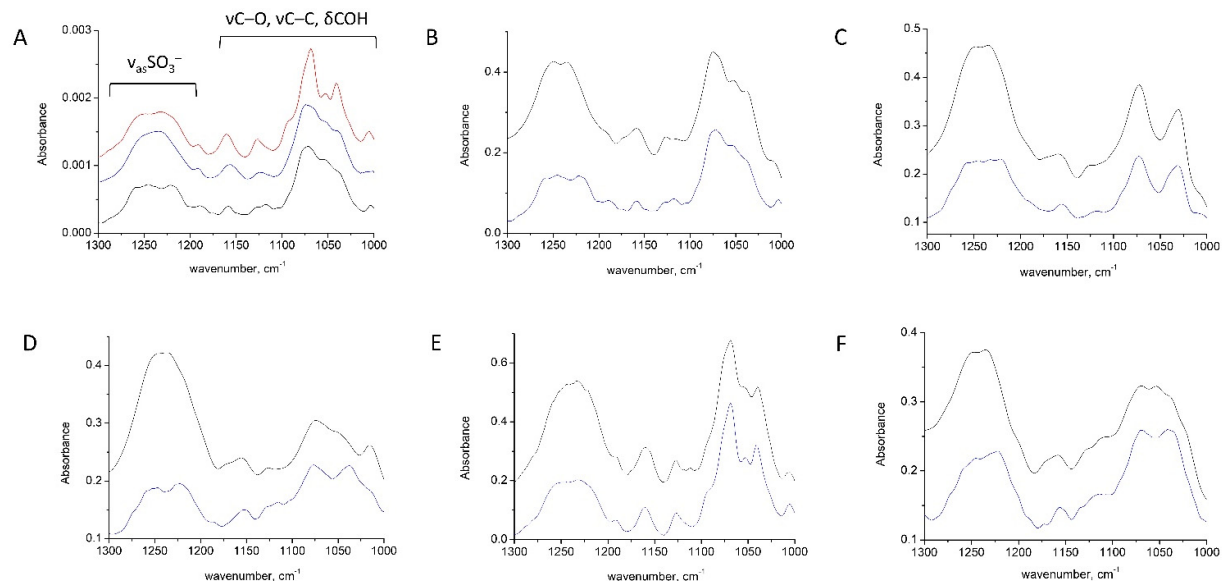

**Figure S2.** Absorbance spectra of 0.5% solution of  $\kappa$ -carrageenan in coil conformation (black), 2% sol of temperature-denatured  $\kappa$ -carrageenan in coil conformation (blue), and 2% gel of  $\kappa$ -carrageenan in helical conformation (red) (A), gel-like complexes of HEWL fibrils with polysaccharides (black) and related spectra of pure polysaccharides (blue) for  $\kappa$ -carrageenan in coil conformation (B),  $\iota$ -carrageenan (C),  $\lambda$ -carrageenan (D),  $\kappa$ -carrageenan in helical conformation (E) and chondroitin-4-sulfate (F).

**Table S1.** Band areas for protein absorption and polysaccharide absorption in complexes of HEWL fibrils and  $\kappa$ -carrageenan (see spectra in Figure 2 A of main text).

| Polysaccharide-to-protein ratio | S1<br>(1700–1600cm <sup>-1</sup> ) | S2<br>(1100–1000cm <sup>-1</sup> ) | S1/S2 |
|---------------------------------|------------------------------------|------------------------------------|-------|
| 0.1                             | 54                                 | 13                                 | 4.2   |
| 0.3                             | 52                                 | 15                                 | 3.5   |
| 0.6                             | 52                                 | 15                                 | 3.5   |

**Table S2.** Some characteristics of Amide I fitting with individual Gaussian components in second-derivative spectra of molecular systems studied (see spectra in Figure S1).

| Sample                     | Wavenumber, cm <sup>-1</sup> | Halfwidth, cm <sup>-1</sup> | Peak area, % | Peak attribution                      |
|----------------------------|------------------------------|-----------------------------|--------------|---------------------------------------|
| Fibrils                    | 1624                         | 20                          | 40           | amyloid β-structure<br>+ side chains* |
| κ-carrageenan              |                              |                             |              |                                       |
| 0.1                        | 1621                         | 13                          | 28           |                                       |
| 0.3                        | 1617                         | 14                          | 14           |                                       |
| 0.6                        | 1619                         | 14                          | 17           |                                       |
| ι-carrageenan              | 1622                         | 20                          | 37           |                                       |
| λ-carrageenan              | 1623                         | 19                          | 42           |                                       |
| κ-carrageenan<br>(helical) | 1622                         | 14                          | 46           |                                       |
| Chondroitin-4-sulfate      | 1619                         | 13                          | 17           |                                       |
|                            |                              |                             |              |                                       |
| Fibrils                    | 1653                         | 13                          | 35           | α-helix                               |
| κ-carrageenan              |                              |                             |              |                                       |
| 0.1                        | 1654                         | 12                          | 27           |                                       |
| 0.3                        | 1654                         | 10                          | 24           |                                       |
| 0.6                        | 1655                         | 10                          | 23           |                                       |
| ι-carrageenan              | 1653                         | 15                          | 34           |                                       |
| λ-carrageenan              | 1654                         | 14                          | 29           |                                       |
| κ-carrageenan<br>(helical) | 1655                         | 12                          | 16           |                                       |
| Chondroitin-4-sulfate      | 1653                         | 11                          | 25           |                                       |
|                            |                              |                             |              |                                       |
| Fibrils                    | 1640                         | 11                          | 9            | intramolecular<br>β-structure         |
| κ-carrageenan              |                              |                             |              |                                       |
| 0.1                        | 1639                         | 19                          | 34           |                                       |
| 0.3                        | 1642                         | 18                          | 47           |                                       |
| 0.6                        | 1642                         | 18                          | 42           |                                       |
| ι-carrageenan              | 1640                         | 12                          | 13           |                                       |
| λ-carrageenan              | 1641                         | 12                          | 13           |                                       |
| κ-carrageenan<br>(helical) | 1638                         | 15                          | 16           |                                       |
| Chondroitin-4-sulfate      | 1639                         | 21                          | 46           |                                       |

\*side chain absorbance usually appears as a minor band and extends from 1609 to 1620 cm<sup>-1</sup> [60]

[60] Barth, A. Infrared Spectroscopy of Proteins. *Biochimica et Biophysica Acta (BBA) - Bioenergetics* **2007**, 1767, 1073-1101, doi:<https://doi.org/10.1016/j.bbabo.2007.06.004>.
